# Supplementary material
Source: PubMed Central journal article supplement (PMC1283441)

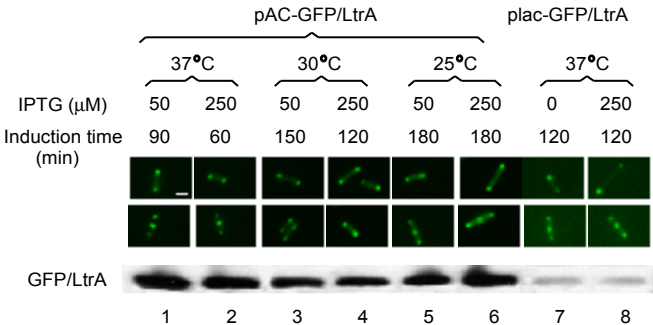

Supplement: pnas_0507057102_1.pdf [file pnas_0507057102_1.pdf]
